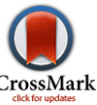

## Correction

# Correction: Early Hospital Mortality among Adult Trauma Patients Significantly Declined between 1998-2011: Three Single-Centre Cohorts from Mumbai, India

## The PLOS ONE Staff

The seventh author's name is spelled incorrectly. The correct name is Li Felländer-Tsai.

## Reference

1. Gerdin M, Roy N, Dharap S, Kumar V, Khajanchi M, et al. (2014) Early Hospital Mortality among Adult Trauma Patients Significantly Declined between 1998-2011: Three Single-Centre Cohorts from Mumbai, India. PLoS ONE 9(3): e90064. doi:10.1371/journal.pone.0090064

**Citation:** The PLOS ONE Staff (2014) Correction: Early Hospital Mortality among Adult Trauma Patients Significantly Declined between 1998-2011: Three Single-Centre Cohorts from Mumbai, India. PLoS ONE 9(6): e99694. doi:10.1371/journal.pone.0099694

**Published:** June 2, 2014

**Copyright:** © 2014 The PLOS ONE Staff. This is an open-access article distributed under the terms of the Creative Commons Attribution License, which permits unrestricted use, distribution, and reproduction in any medium, provided the original author and source are credited.
